# Supplementary material for: Assessment of the interannual variability and influence of the QBO and upwelling on tracer–tracer distributions of N 2 O and O 3 in the tropical lower stratosphere
Source: Copernicus journal article supplement (doi:10.5194/acp-13-3619-2013), 2013-04-02
Supplement: Supplementary file 1 [file acp-13-3619-2013-supplement.pdf]

# **Khosrawi et al.: Assessment of the interannual variability and impact of the QBO and upwelling on tracer-tracer distributions of N<sub>2</sub>O and O<sub>3</sub> in the tropical lower stratosphere**

## **Electronic supplement**

### **Latitudinal occurrence of N<sub>2</sub>O > 320 ppbv:**

In Figure 1 the N<sub>2</sub>O mixing ratios 650±25 K that are larger than 320 ppbv are plotted on a map for January, April, July and October 2003. These high N<sub>2</sub>O mixing ratios occur solely in the tropics.

### **Odin/SMR:**

Considering the maximum N<sub>2</sub>O mixing ratios of the averaged bins for the years 2003 to 2010 a higher occurrence of these high N<sub>2</sub>O values is found in 2003, 2004, 2007 than in the other years (Table 1). High N<sub>2</sub>O mixing ratios are found in 2003 during all winter months (January to March and October to November), but in 2004 only at the begin of the year (January to March), in 2005 and 2007 only at the end of the year (November to December), in 2006 and 2010 only in two months (January and October and January and March, respectively) and 2008 and 2009 only in one month (February and November, respectively). Lowest maximum N<sub>2</sub>O values are found during summer months (June and July in 2004-2005, June to August in 2006, May to July 2007, May to August 2008 and 2009 and July to August 2010). One exception, however, of this scheme is found in 2007, when the lowest value was found in January.

### **Aura/MLS:**

Though the highest N<sub>2</sub>O averages from Aura/MLS are ~ 20 ppbv lower than the monthly averages from Odin/SMR, a similar structure of higher N<sub>2</sub>O values during winter months is found (Table 2). The summer minima, however, are not as strongly pronounced in the Aura/MLS data as in Odin/SMR data (see paper for more details).

### **ENVISAT/MIPAS:**

In 2003 and 2004, before the intermission in the ENVISAT/MIPAS operation, maximum N<sub>2</sub>O mixing ratios of 330 ppbv are found between February and April. From 2005 onwards when ENVISAT/MIPAS continued its operation with a lower spectral resolution much lower N<sub>2</sub>O mixing ratios (Table 3) are found than in 2003 and 2004 due to measures in the adjusted retrieval approach to reduce the high bias which had been identified for the 2002 - 2004 data set.

**SD-WACCM:**

No structure as pronounced as in the satellite data sets showing higher maximum  $\text{N}_2\text{O}$  mixing ratios of the averaged bins during winter months are found Table 4. However, higher values are found during Mai 2007, February 2009 and from January to June 2010. The QBO in SD-WACCM is realistically simulated and in good agreement with the QBO derived from Odin/SMR (not shown). However, in WACCM the QBO does not propagate as far down as in Odin/SMR. This may explain why we do not see the structure of higher  $\text{N}_2\text{O}$  values in winter than in summer that pronounced in SD-WACCM than in the satellite data.

**Sensitivity studies:**

Sensitivity studies on the effect of the bias/noise error on the interannual variability. The following cases were considered:

1. Monthly averages have only been calculated up to 320 ppbv.
2. Monthly averages were calculated for the entire Odin/SMR data set being reduced by 20 ppbv.

Both figures (Figure 2 and 3) are identical to the figure shown in the paper. The only difference is that the last bin (330 ppb) is missing. Thus, the noise error in the Odin/SMR data does not have any influence on the interannual variability or on the application of the method for a model evaluation/satellite intercomparison. In the first figure where the bins are only calculated up to 320 ppb, the variation due to the QBO in  $\text{N}_2\text{O}$  is not visible anymore. This is due to the fact that the values are simply cut-off. The second case which is more realistic for a considering a bias/noise error in a data set, the variation in the last bin is exactly visible as in the tables in electronic supplement, with the only exception that the absolute values are 20 ppb lower and that the curves are shifted 20 ppb to the left.

**QBO Amplitudes:**

The fact, that the seasonal and interannual variability of higher/lower  $\text{N}_2\text{O}$  values is real can be seen from the figures showing the time series and QBO amplitudes (Figure 4 and 5). The QBO amplitudes were calculated with a linear regression model. That model consisted of an offset, a linear term, sine and cosine functions with periods of 6 and 12 months to represent the semi-annual and annual variation as well two QBO proxies in form of the Singapore winds at 50 hPa and 30 hPa. Those two proxies are approximately orthogonal and therefore allow an estimation of the QBO phase.

Although the absolute values from Odin/SMR may be too high, the strength of the amplitude agrees with what is found from the ENVISAT/MIPAS data (Figure 6 and 7). Further, from the time series and QBO amplitudes we

derive a variation of  $\text{N}_2\text{O}$  of the order of  $\pm 10\text{-}15$  ppbv (Odin/SMR) and  $\pm 10$  ppbv (ENVISAT/MIPAS) and of  $\pm 1$  ppmv in  $\text{O}_3$  (Odin/SMR) in absolute values at 25 km. The corresponding amplitudes in  $\text{N}_2\text{O}$  are  $\pm 6$  ppbv (Odin/SMR) and  $\pm 4$  ppbv (ENVISAT/MIPAS) and in  $\text{O}_3$   $\pm 0.5$  ppmv. The variation in  $\text{N}_2\text{O}$  and  $\text{O}_3$  due to the QBO is in the order of the variations we see in the monthly averages and can thus be attributed to the QBO (see Figure 4-9).

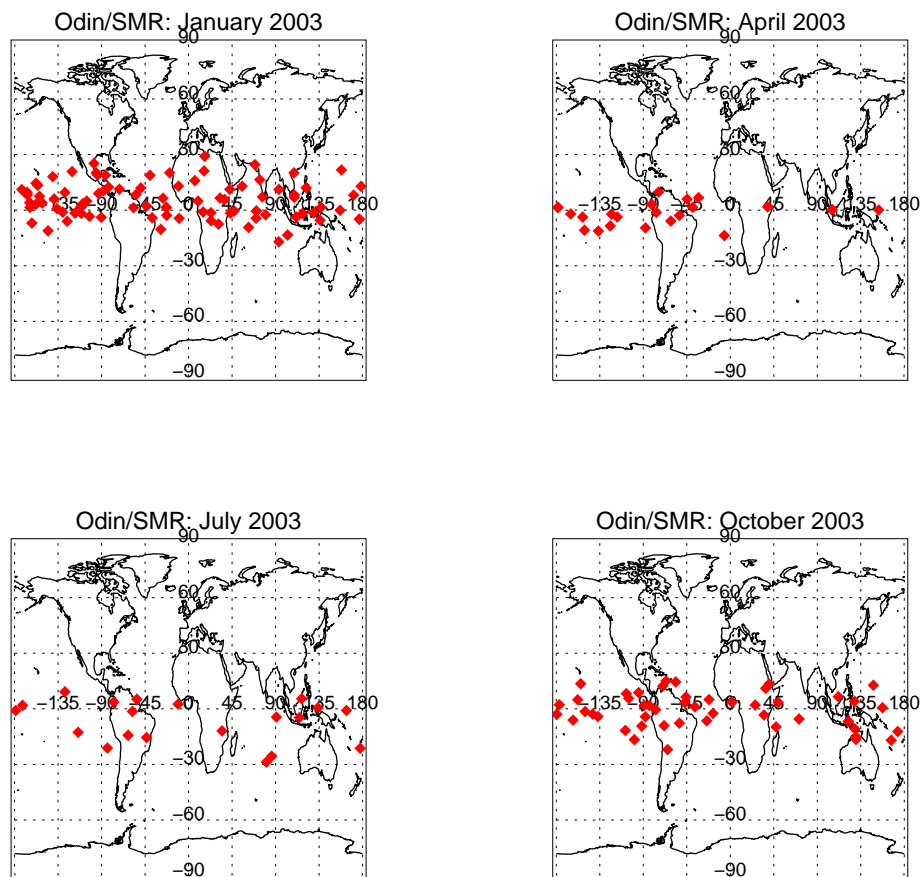

Figure 1: Locations where Odin/SMR  $N_2O$  mixing ratios greater 320 ppbv are observed at  $650 \pm 25$  K during 2003 (NH). Shown is every third month, thus January (top, left), April (top, right), July (bottom, left) and October (bottom, right).

Table 1: Odin/SMR: Maximum monthly averaged N<sub>2</sub>O mixing ratios (averaged mixing ratio of the last N<sub>2</sub>O bin) at 650±25 K. Maxima and Minima are marked in bold face.

| Month/Year | 2003       | 2004       | 2005       | 2006       | 2007       | 2008       | 2009       | 2010       |
|------------|------------|------------|------------|------------|------------|------------|------------|------------|
| January    | <b>330</b> | <b>330</b> | 310        | <b>330</b> | <b>290</b> | 310        | 310        | <b>330</b> |
| February   | <b>330</b> | <b>330</b> | 310        | 310        | 310        | <b>330</b> | 310        | 310        |
| March      | <b>330</b> | <b>330</b> | 310        | 310        | 310        | 310        | 310        | <b>330</b> |
| April      | 310        | 310        | 310        | 310        | 310        | 310        | 310        | 310        |
| May        | 310        | 310        | 310        | 310        | <b>290</b> | <b>290</b> | <b>290</b> | 310        |
| June       | 310        | <b>290</b> | <b>290</b> | <b>290</b> | <b>290</b> | <b>290</b> | <b>290</b> | 310        |
| July       | 310        | <b>290</b> |
| August     | 310        | 310        | 310        | <b>290</b> | 310        | <b>290</b> | <b>290</b> | <b>290</b> |
| September  | 310        | 310        | 310        | 310        | 310        | 310        | 310        | 310        |
| October    | <b>330</b> | 310        | 310        | <b>330</b> | <b>330</b> | 310        | 310        | 310        |
| November   | <b>330</b> | 310        | <b>330</b> | 310        | <b>330</b> | 310        | <b>330</b> | 310        |
| December   | <b>330</b> | 310        | <b>330</b> | 310        | <b>330</b> | 310        | 310        | 310        |

Table 2: Aura/MLS: Maximum monthly averaged N<sub>2</sub>O mixing ratios (averaged mixing ratio of the last N<sub>2</sub>O bin) at 650±25 K. Maxima and Minima are marked in bold face.

| Month/Year | 2003 | 2004 | 2005       | 2006       | 2007       | 2008 | 2009       | 2010       |
|------------|------|------|------------|------------|------------|------|------------|------------|
| January    | -    | -    | <b>310</b> | <b>310</b> | <b>310</b> | 290  | <b>310</b> | <b>310</b> |
| February   | -    | -    | <b>310</b> | <b>310</b> | <b>310</b> | 290  | <b>310</b> | <b>310</b> |
| March      | -    | -    | <b>310</b> | 290        | <b>310</b> | 290  | <b>310</b> | <b>310</b> |
| April      | -    | -    | 290        | 290        | 290        | 290  | 290        | <b>310</b> |
| May        | -    | -    | 290        | -          | 290        | 290  | 290        | <b>310</b> |
| June       | -    | -    | 290        | <b>270</b> | 290        | 290  | 290        | -          |
| July       | -    | -    | 290        | <b>270</b> | 290        | 290  | 290        | -          |
| August     | -    | -    | 290        | 290        | 290        | 290  | 290        | -          |
| September  | -    | 290  | 290        | 290        | 290        | 290  | 290        | -          |
| October    | -    | 290  | 290        | 290        | 290        | 290  | <b>310</b> | -          |
| November   | -    | 290  | 290        | -          | <b>310</b> | 290  | <b>310</b> | 290        |
| December   | -    | 290  | 290        | 290        | 290        | 290  | <b>310</b> | 290        |

Table 3: ENVISAT/MIPAS: Maximum monthly averaged N<sub>2</sub>O mixing ratios (averaged mixing ratio of the last N<sub>2</sub>O bin) at 650±25 K. Maxima and Minima are marked in bold face.

| Month/Year | 2003       | 2004 | 2005       | 2006       | 2007       | 2008       | 2009       | 2010 |
|------------|------------|------|------------|------------|------------|------------|------------|------|
| January    | 310        | 310  | <b>250</b> | 270        | 270        | <b>290</b> | <b>290</b> | -    |
| February   | <b>330</b> | 310  | 270        | -          | 270        | <b>290</b> | 270        | -    |
| March      | <b>330</b> | 310  | 270        | 270        | 270        | <b>290</b> | 270        | -    |
| April      | <b>330</b> | -    | <b>250</b> | -          | 270        | 270        | 270        | -    |
| May        | 310        | -    | <b>250</b> | 270        | 270        | 270        | 270        | -    |
| June       | 310        | -    | 270        | <b>250</b> | 270        | 270        | 270        | -    |
| July       | 310        | -    | <b>250</b> | 270        | 270        | 270        | <b>290</b> | -    |
| August     | 310        | -    | 270        | 270        | <b>290</b> | 270        | <b>290</b> | -    |
| September  | 310        | -    | -          | 270        | 270        | 270        | <b>290</b> | -    |
| October    | 310        | -    | -          | 270        | 270        | 270        | <b>290</b> | -    |
| November   | 310        | -    | -          | 270        | 270        | 270        | <b>290</b> | -    |
| December   | 310        | -    | 270        | 270        | <b>290</b> | 270        | <b>290</b> | -    |

Table 4: WACCM: Maximum monthly averaged N<sub>2</sub>O mixing ratios (averaged mixing ratio of the last N<sub>2</sub>O bin) at 650±25 K. Maxima and Minima are marked in bold face.

| Month/Year | 2003 | 2004 | 2005 | 2006 | 2007       | 2008 | 2009       | 2010       |
|------------|------|------|------|------|------------|------|------------|------------|
| January    | -    | -    | 270  | 270  | 280        | 270  | 280        | <b>290</b> |
| February   | -    | -    | 280  | 270  | 280        | 270  | <b>290</b> | <b>290</b> |
| March      | -    | -    | 280  | 270  | 280        | 280  | 280        | <b>290</b> |
| April      | -    | -    | 280  | 270  | 280        | 270  | 280        | <b>290</b> |
| May        | -    | -    | 280  | 270  | <b>290</b> | 280  | 280        | <b>290</b> |
| June       | -    | -    | 280  | 270  | 280        | 280  | 280        | <b>290</b> |
| July       | -    | -    | 280  | 270  | 280        | 280  | 270        | 280        |
| August     | -    | -    | 280  | 270  | 280        | 280  | <b>260</b> | 270        |
| September  | -    | -    | 280  | 270  | 280        | 270  | 270        | 270        |
| October    | -    | -    | 270  | 270  | 270        | 270  | 270        | -          |
| November   | -    | -    | 280  | 270  | 270        | 270  | 280        | -          |
| December   | -    | -    | 270  | 280  | 270        | 280  | 280        | -          |

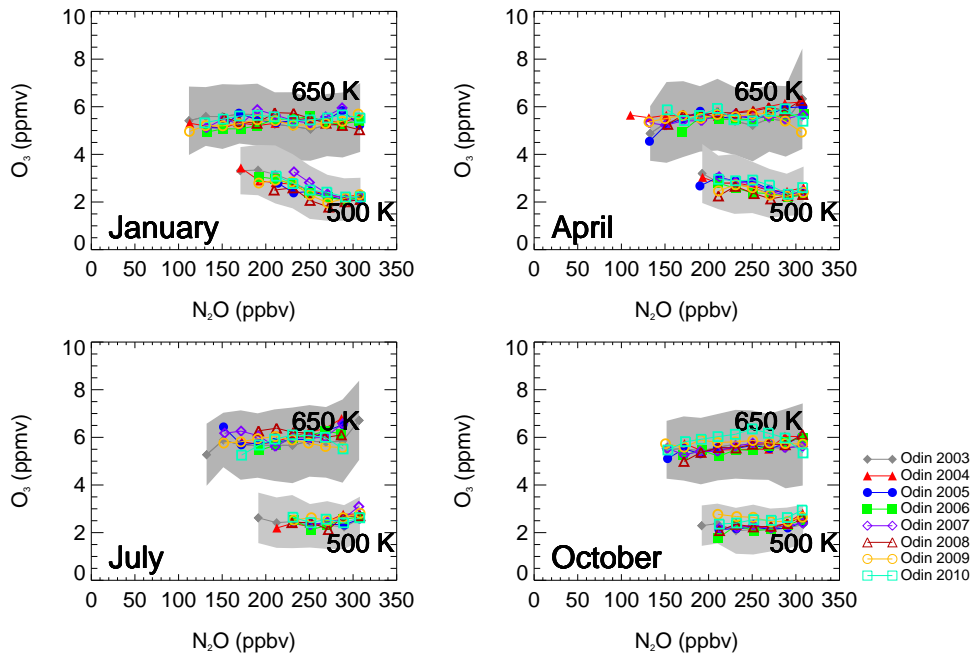

Figure 2: Odin/SMR climatology for 2003. Averages were calculated only up to 320 ppb.

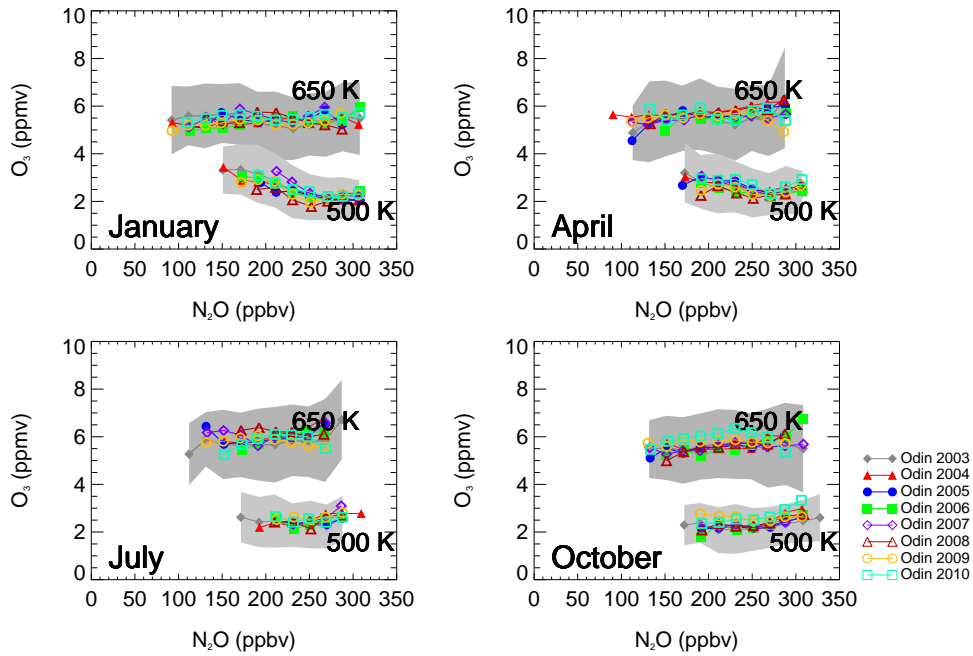

Figure 3: Odin/SMR climatology for 2003. The Odin/SMR data has been reduced by 20 ppb.

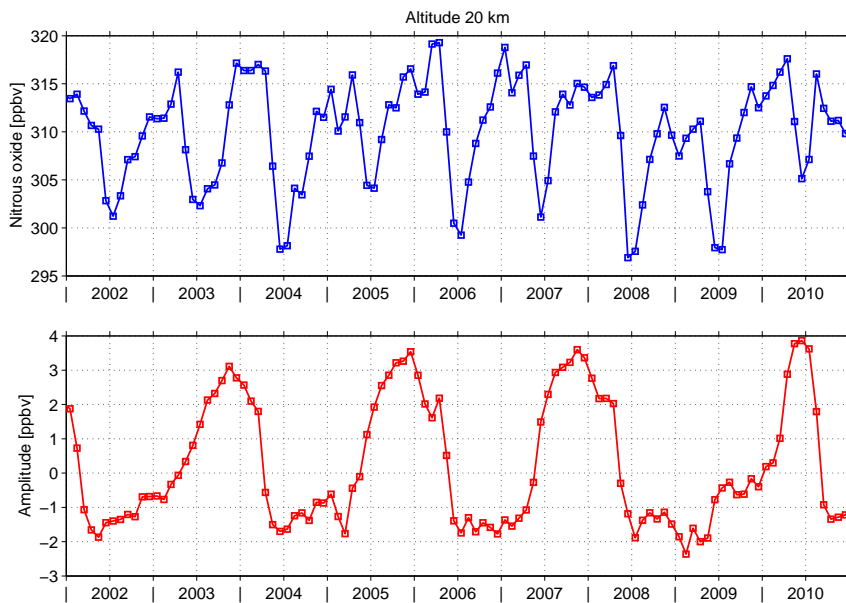

Figure 4:  $\text{N}_2\text{O}$  time series (top) and QBO  $\text{N}_2\text{O}$  amplitude (bottom) derived from Odin/SMR at 20 km.

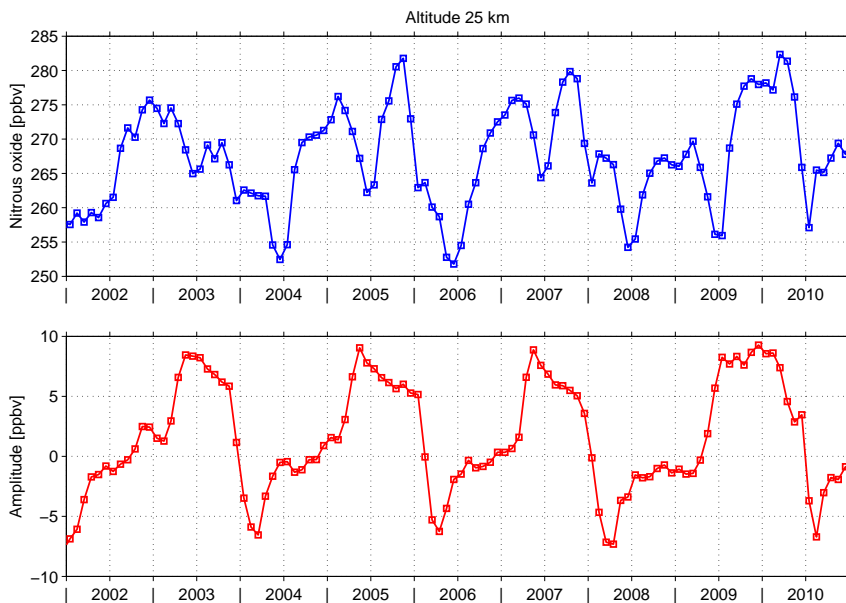

Figure 5:  $\text{N}_2\text{O}$  time series (top) and QBO  $\text{N}_2\text{O}$  amplitude (bottom) derived from Odin/SMR at 25 km.



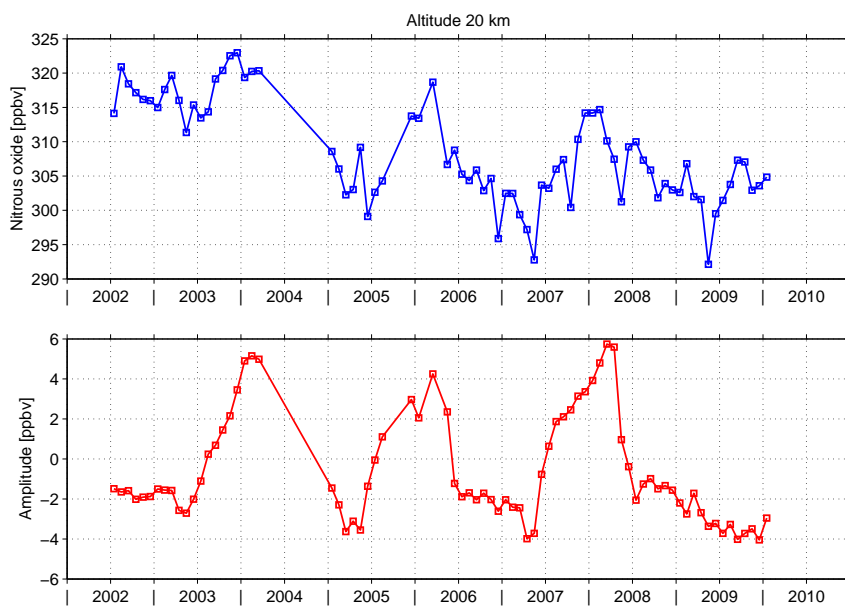

Figure 6: N<sub>2</sub>O time series (top) and QBO N<sub>2</sub>O amplitude (bottom) derived from ENVISAT/MIPAS at 20 km.

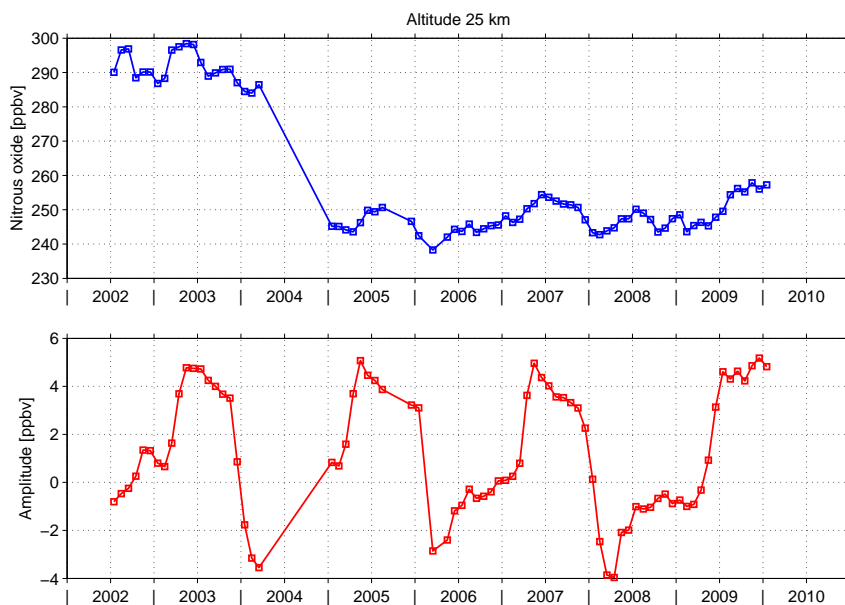

Figure 7: N<sub>2</sub>O time series (top) and QBO N<sub>2</sub>O amplitude (bottom) derived from ENVISAT/MIPAS at 25 km.

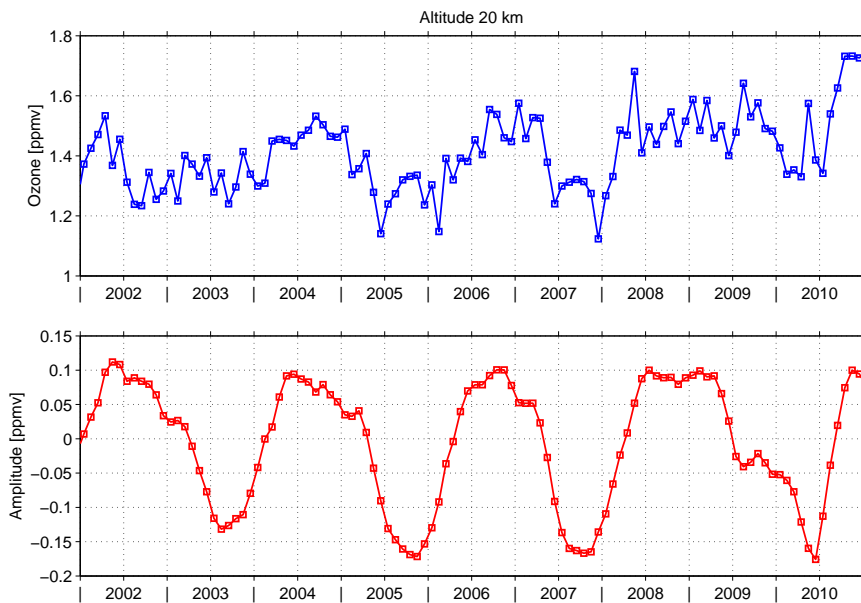

Figure 8: O<sub>3</sub> time series (top) and QBO O<sub>3</sub> amplitude (bottom) derived from Odin/SMR at 20 km

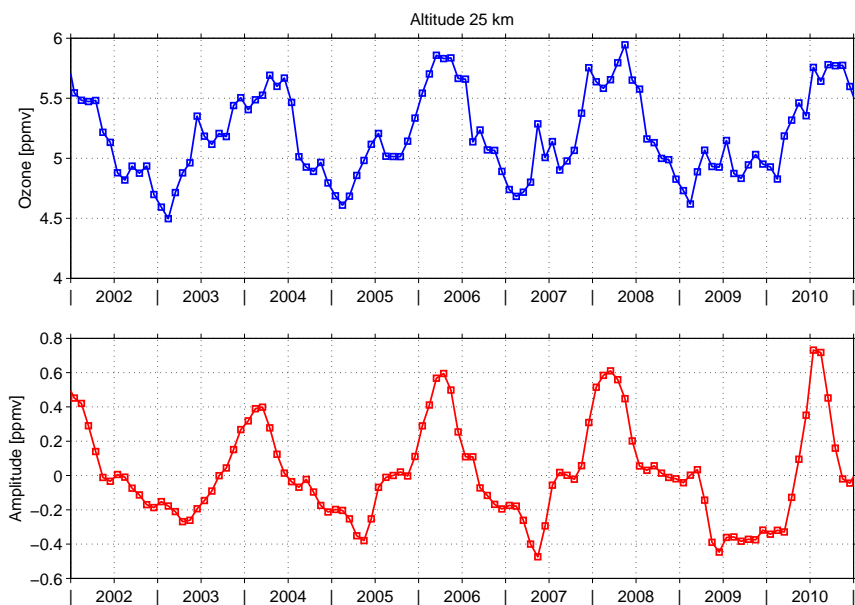

Figure 9: O<sub>3</sub> time series (top) and O<sub>3</sub> QBO amplitude (bottom) derived from Odin/SMR at 25 km.
